# Supplementary material for: Inhibition of Osteoarthritis-Related Molecules by Isomucronulatol 7-O-β-d-glucoside and Ecliptasaponin A in IL-1β-Stimulated Chondrosarcoma Cell Model
Source: PubMed Central journal article supplement (PMC6278319; doi:10.3390/molecules23112807), 2018-10-29
Supplement: molecules-23-02807-s001.pdf [file molecules-23-02807-s001.pdf]

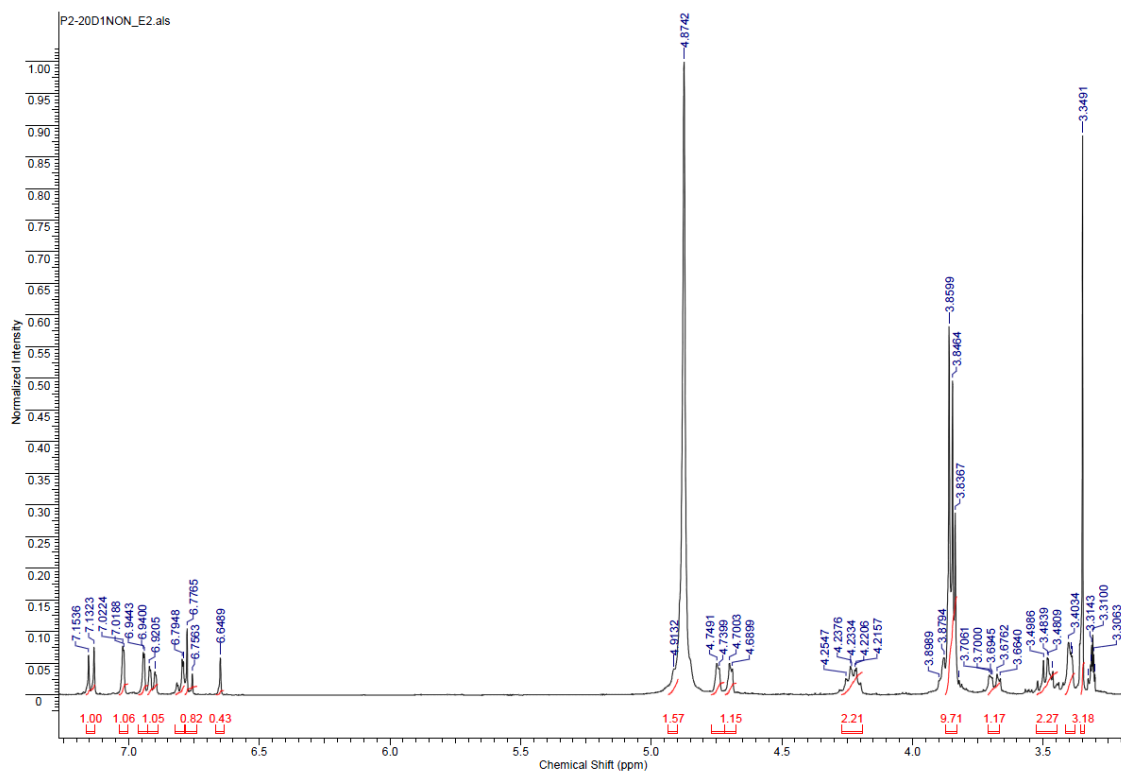

Figure S1. <sup>1</sup>H-NMR of (-)-pinoresinol 4-O-β-D-glucopyranoside (1).

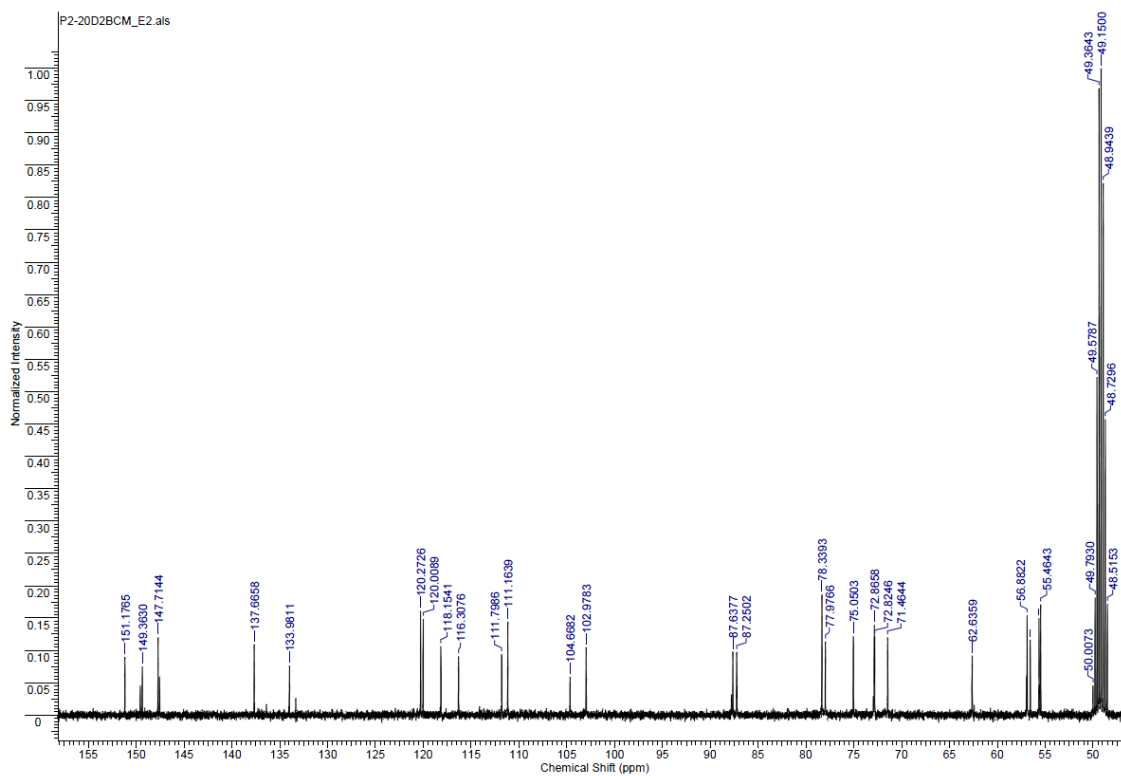

Figure S2. <sup>13</sup>C-NMR of (-)-pinoresinol 4-O-β-D-glucopyranoside (1).

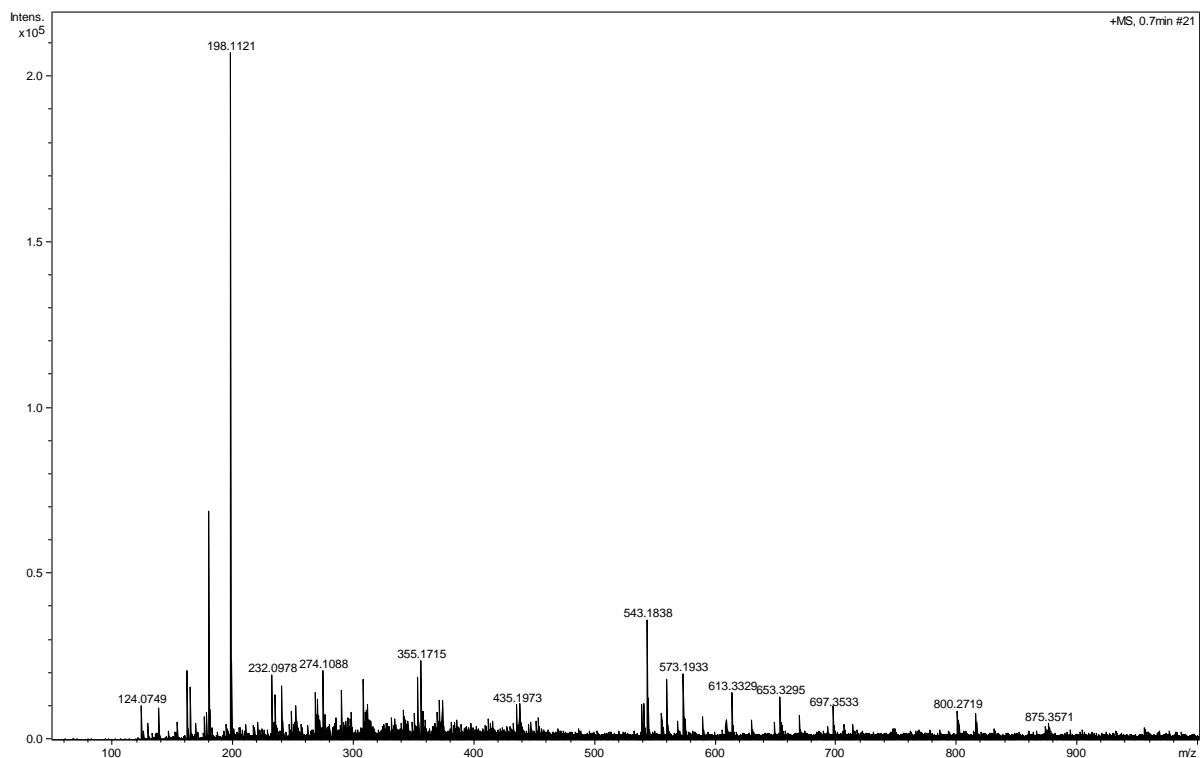

Figure S3. ESI-MS spectra of (-)-pinoresinol 4-*O*- $\beta$ -D-glucopyranoside (**1**).

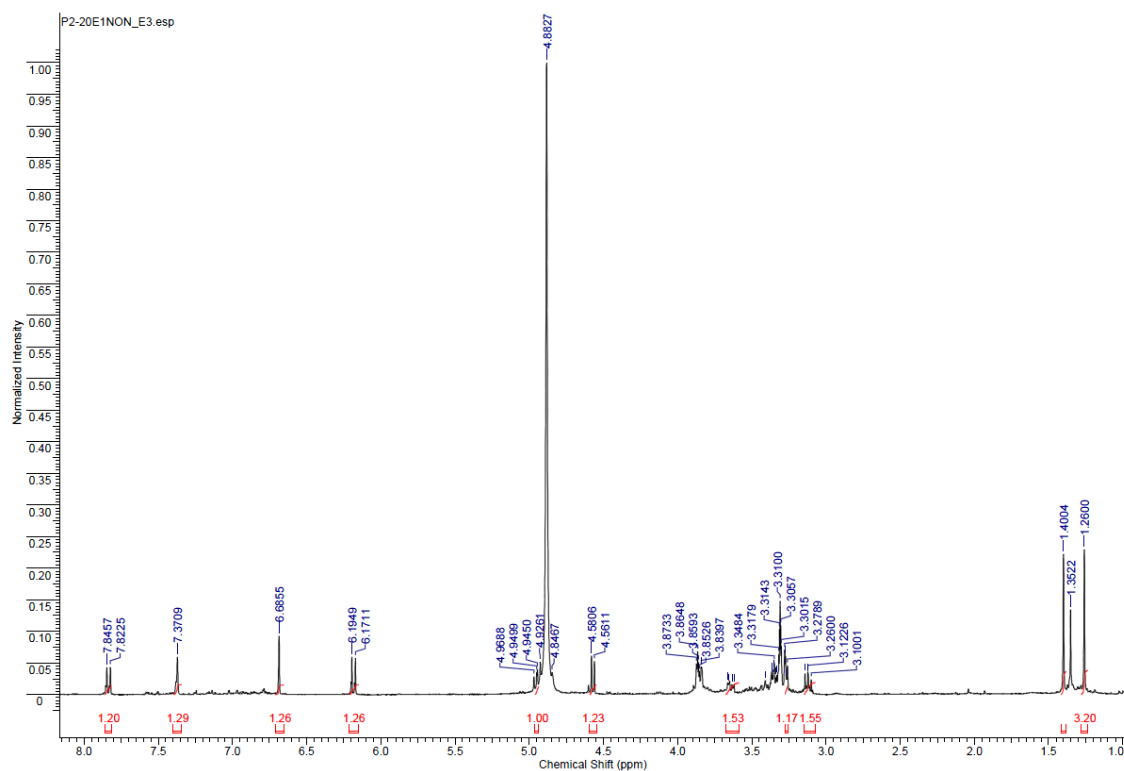

Figure S4. <sup>1</sup>H-NMR spectra of (-)-marmesinin (2).

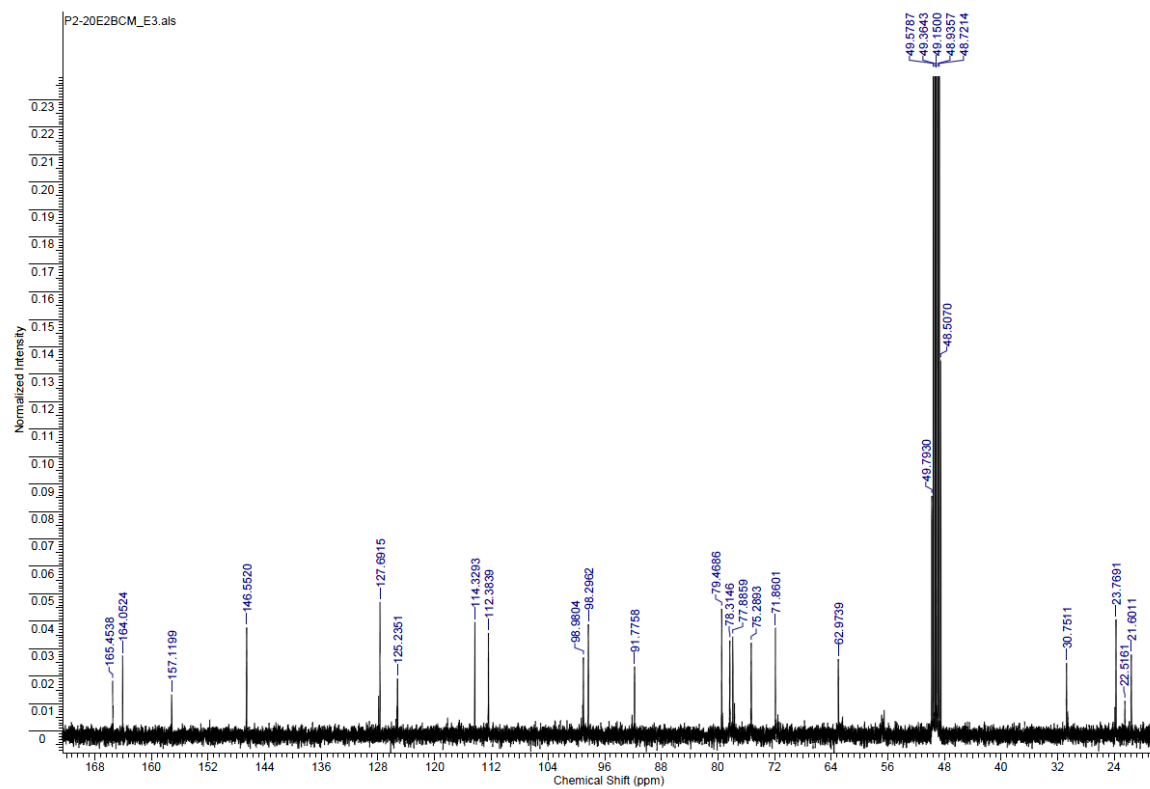

Figure S5. <sup>13</sup>C-NMR spectra of (-)-marmesinin (2).

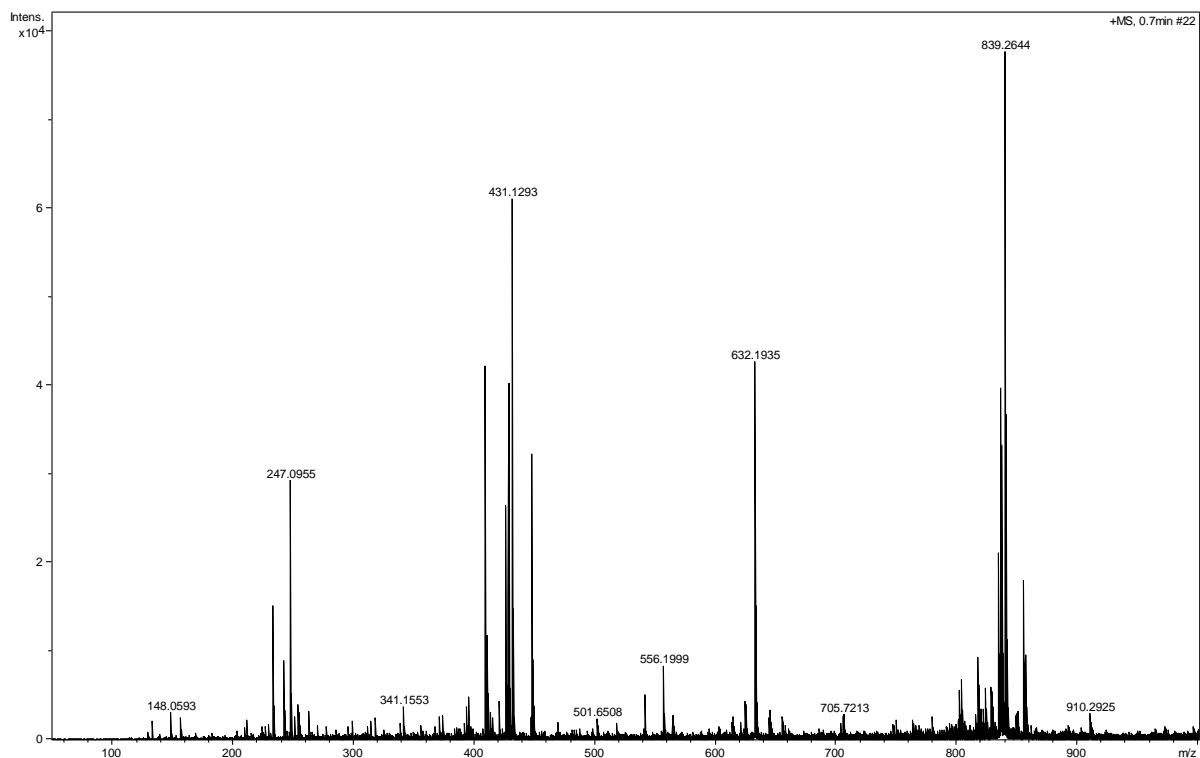

Figure S6. ESI-MS spectra of (-)-marmesinin (2).

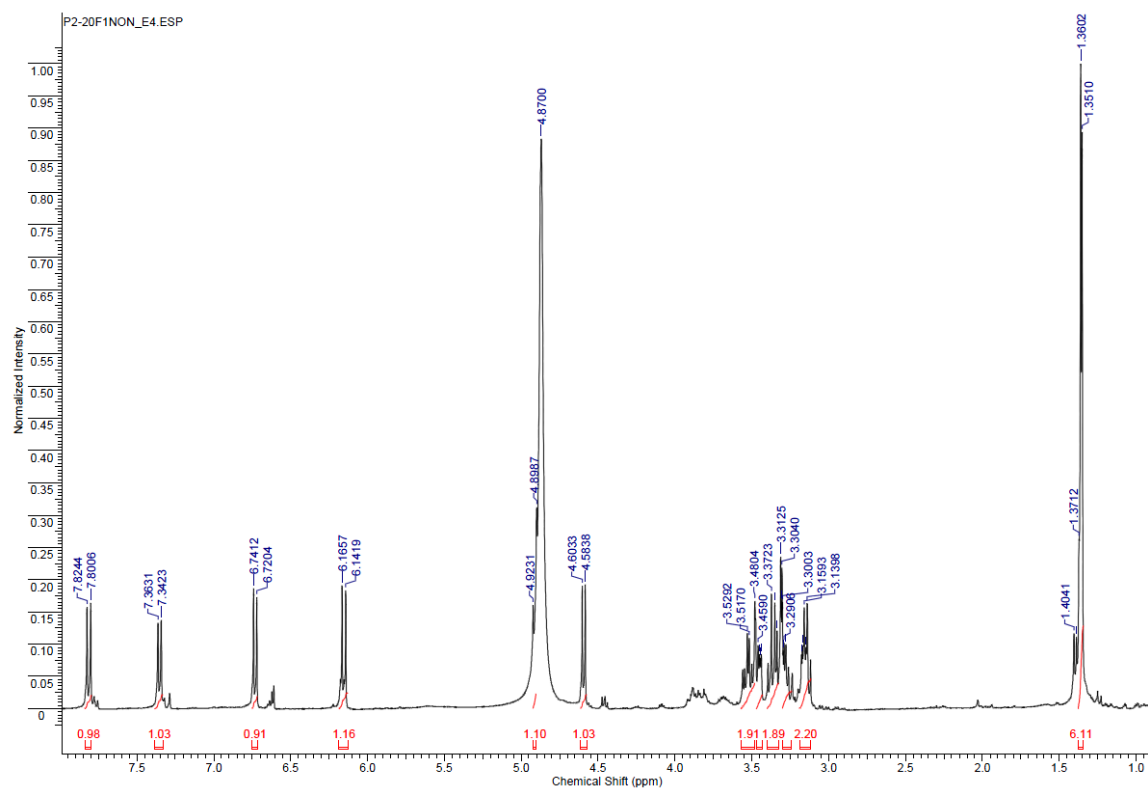

Figure S7. <sup>1</sup>H-NMR spectra of columbianetin β-D-glucopyranoside (3).

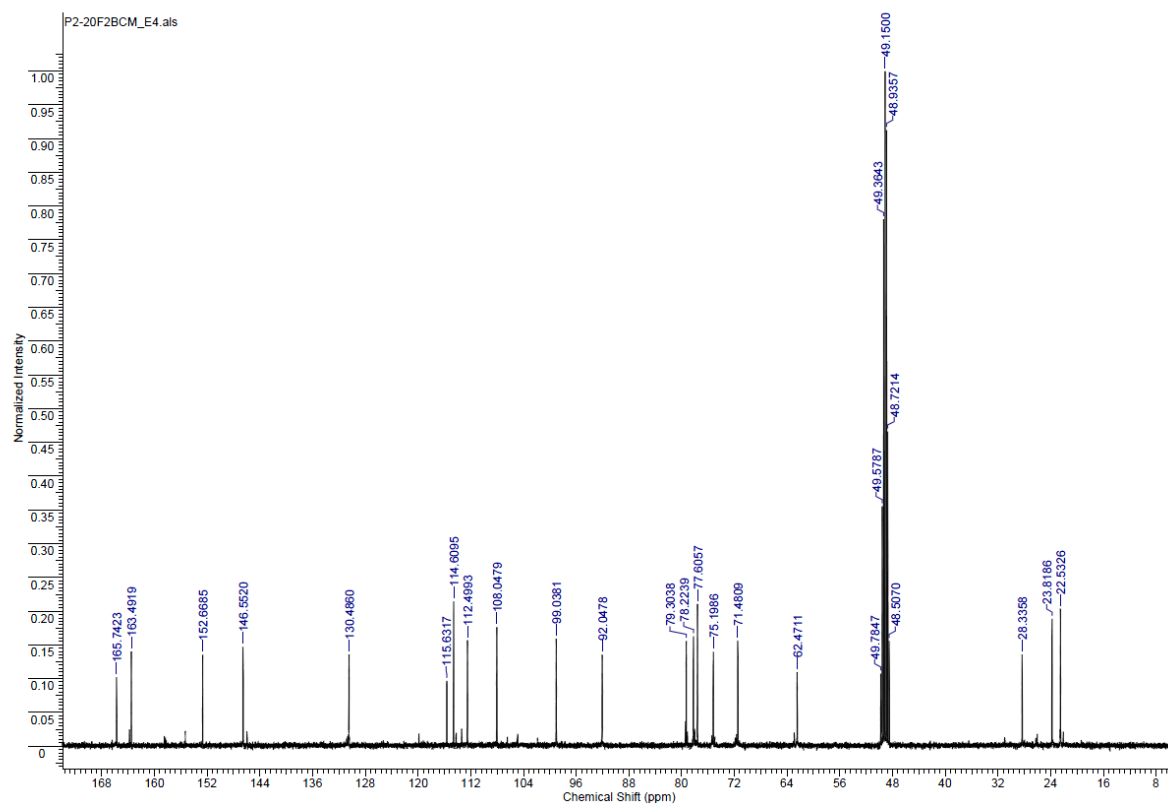

Figure S8. <sup>13</sup>C-NMR spectra of columbianetin β-D-glucopyranoside (3).

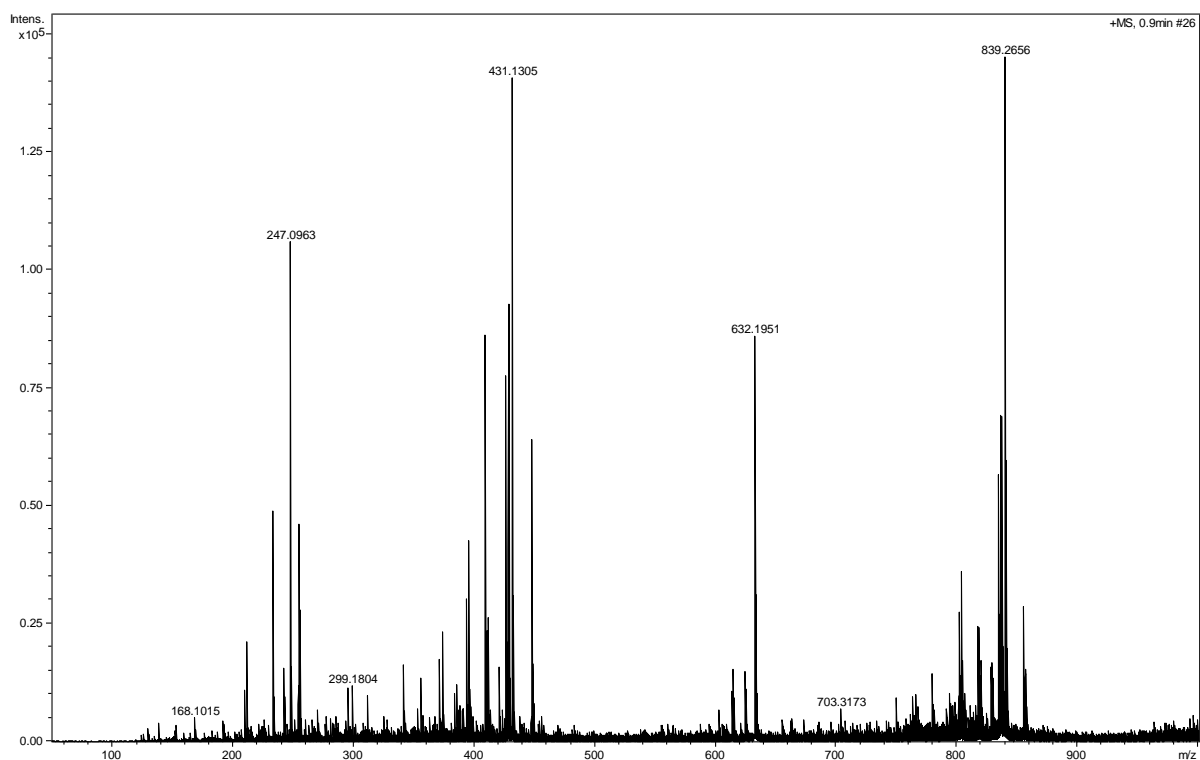

Figure S9. ESI-MS spectra of columbianetin  $\beta$ -D-glucopyranoside (3).

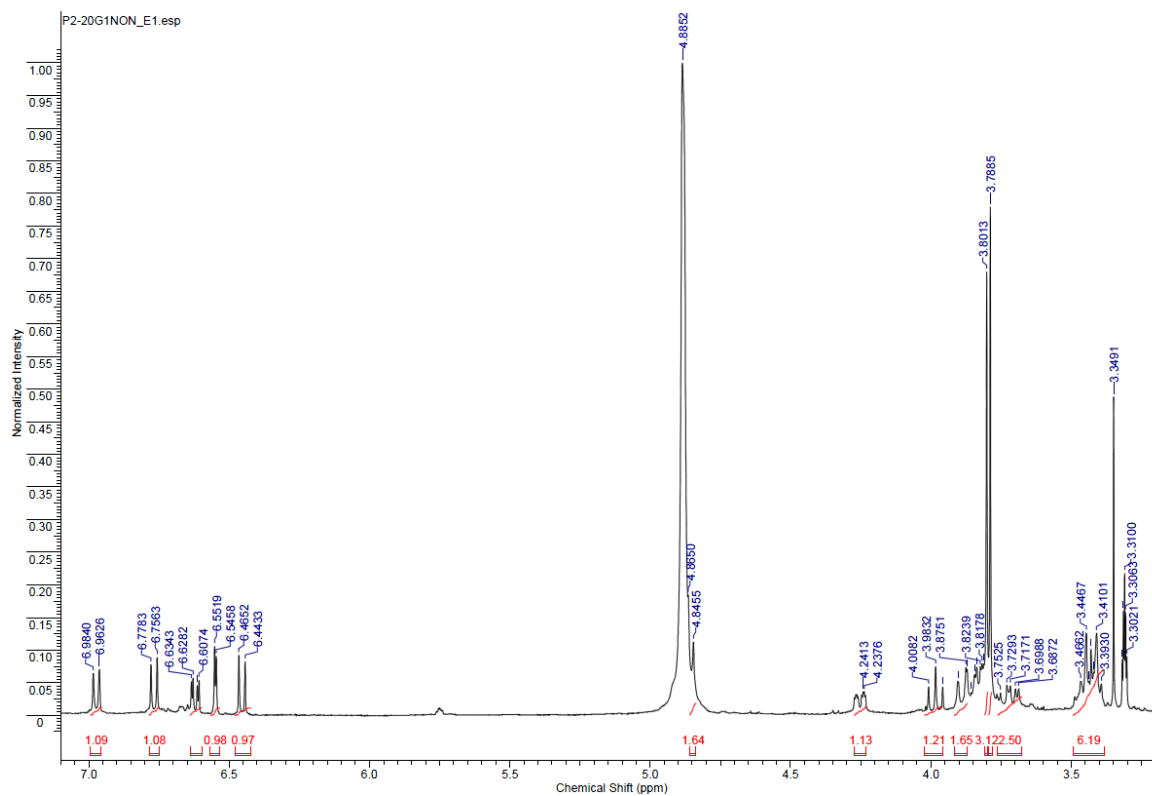

Figure S10. <sup>1</sup>H-NMR spectra of isomucronulatol 7-O-β-D-glucoside (4).

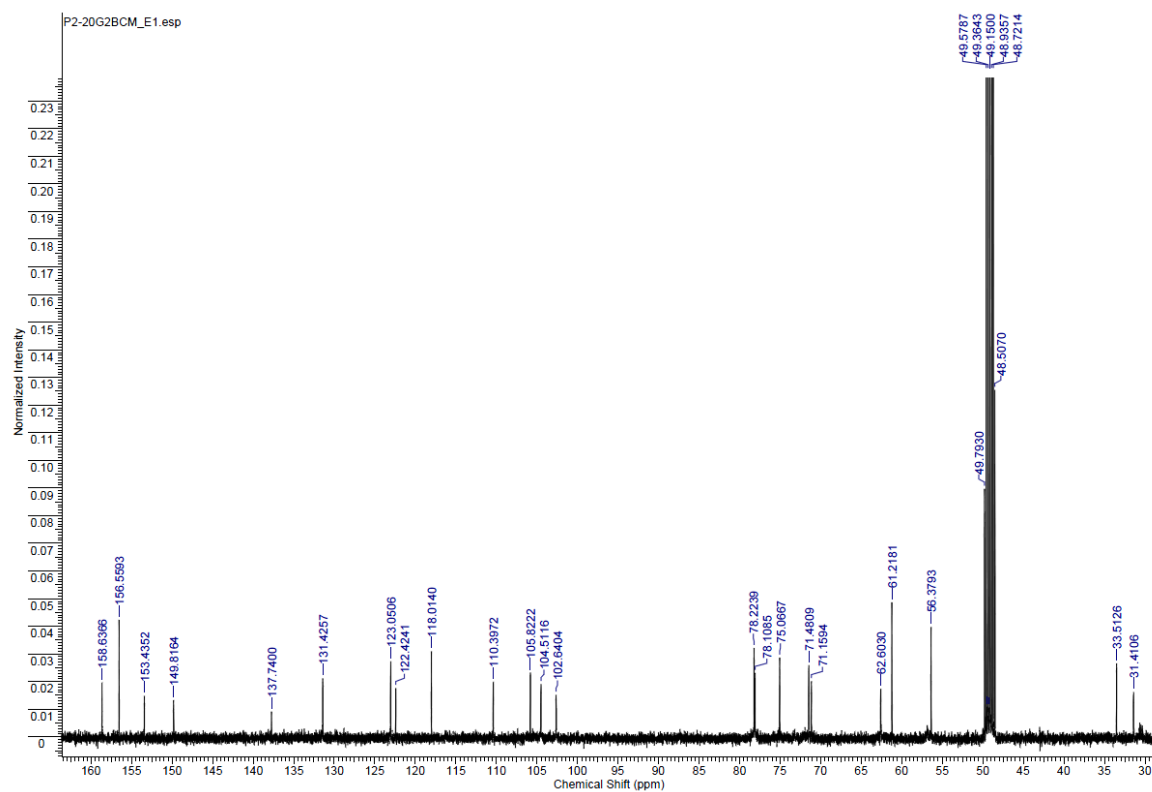

Figure S11. <sup>13</sup>C-NMR spectra of isomucronulatol 7-O-β-D-glucoside (4).

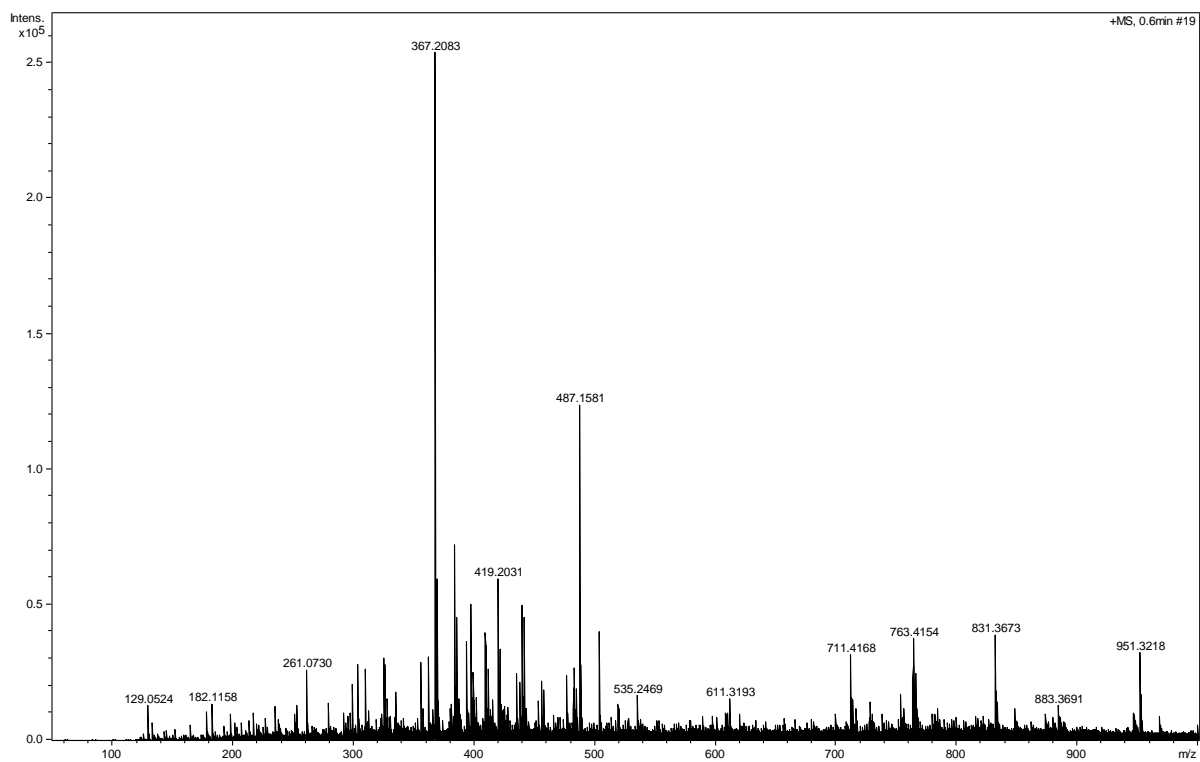

Figure S12. ESI-MS spectra of isomucronulatol 7-*O*- $\beta$ -D-glucoside (**4**).



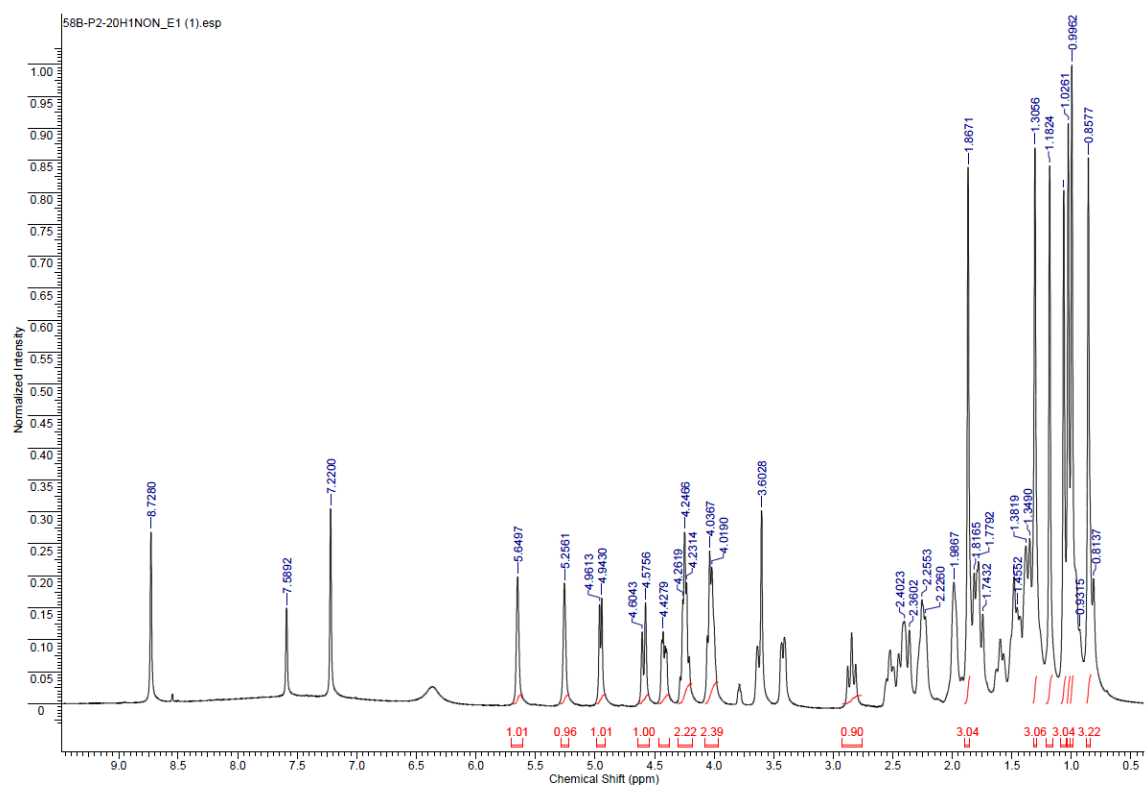

Figure S13.  $^1\text{H}$ -NMR spectra of ecliptasaponin A (5).

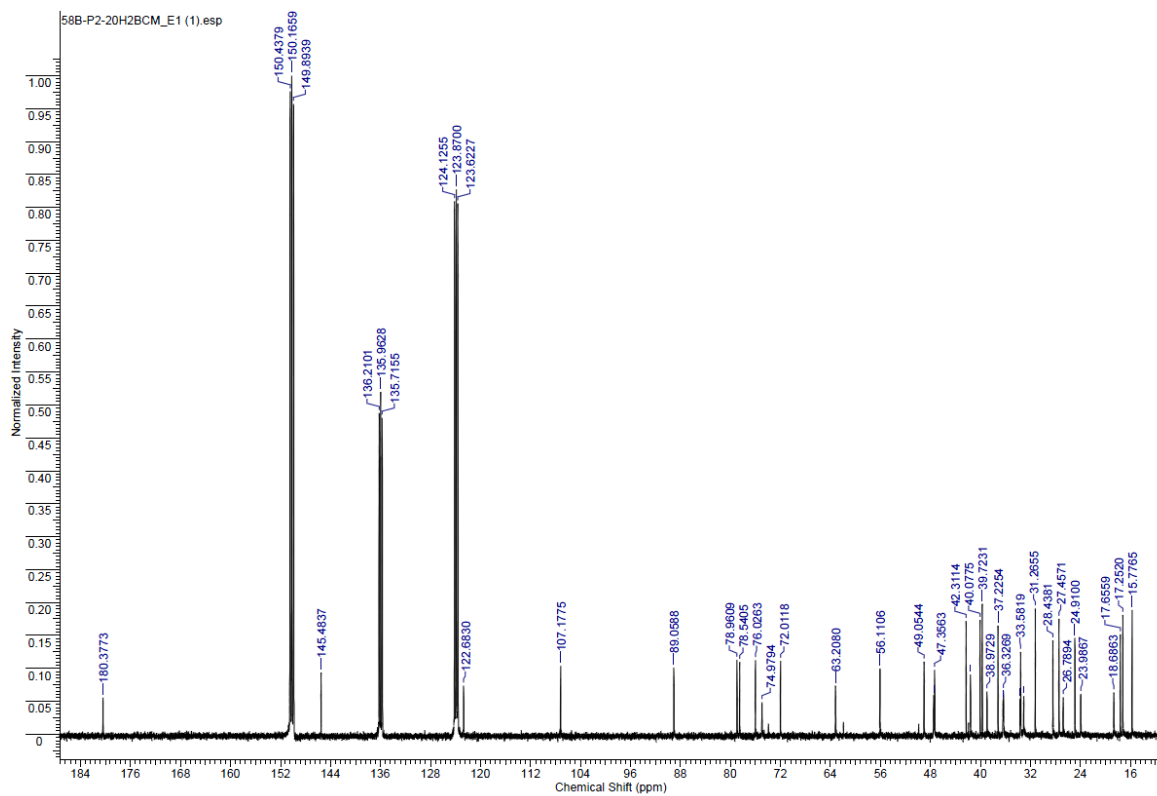

Figure S14.  $^{13}\text{C}$ -NMR spectra of ecliptasaponin A (5).

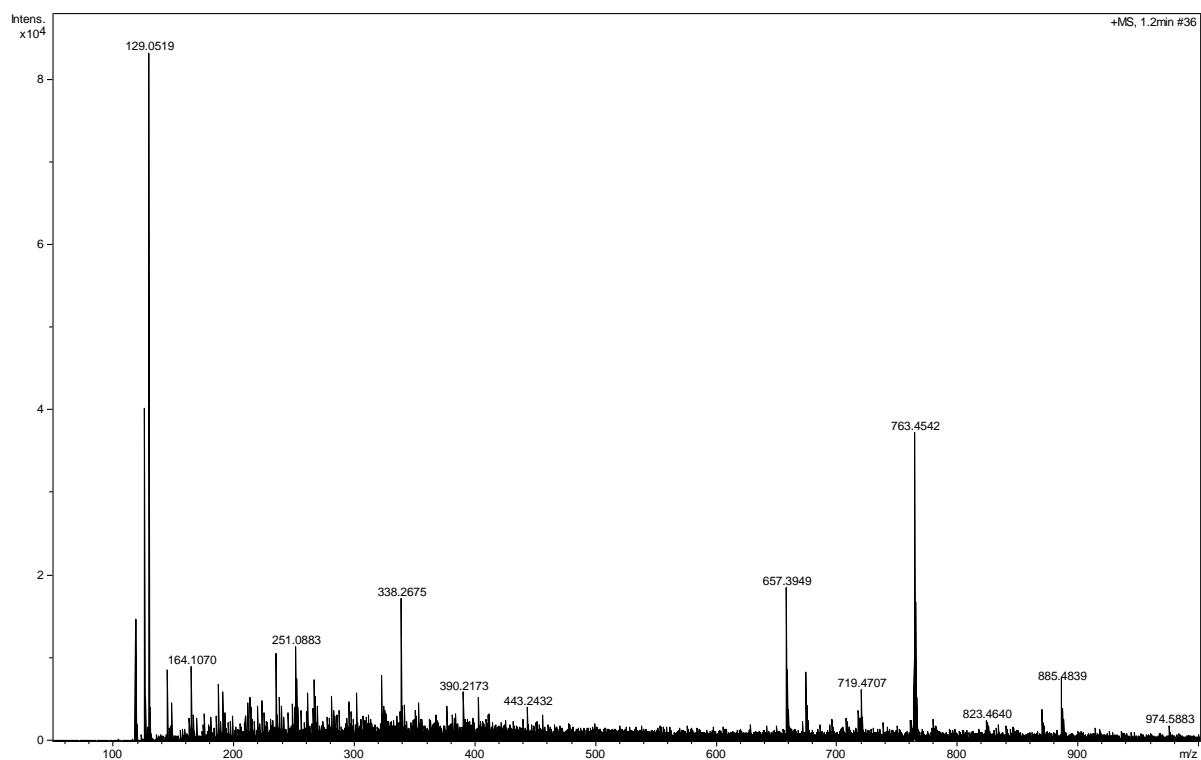

Figure S15. ESI-MS spectra of ecliptasaponin A (5).
